# Supplementary material
Source: PubMed Central journal article supplement (PMC7879459)
Supplement: NIHMS1624866-supplement-supp_info.pdf [file NIHMS1624866-supplement-supp_info.pdf]

Copyright WILEY-VCH Verlag GmbH & Co. KGaA, 69469 Weinheim, Germany, 2018.

## Supporting Information

### **Targeted heating of mitochondria greatly augments nanoparticle-mediated cancer chemotherapy**

*Jiangsheng Xu, James G. Shamul, Hai Wang, John Lin, Pranay Agarwal, Mingrui Sun, Xiongbing Lu, Katherine H.R. Tkaczuk, Xiaoming He\**

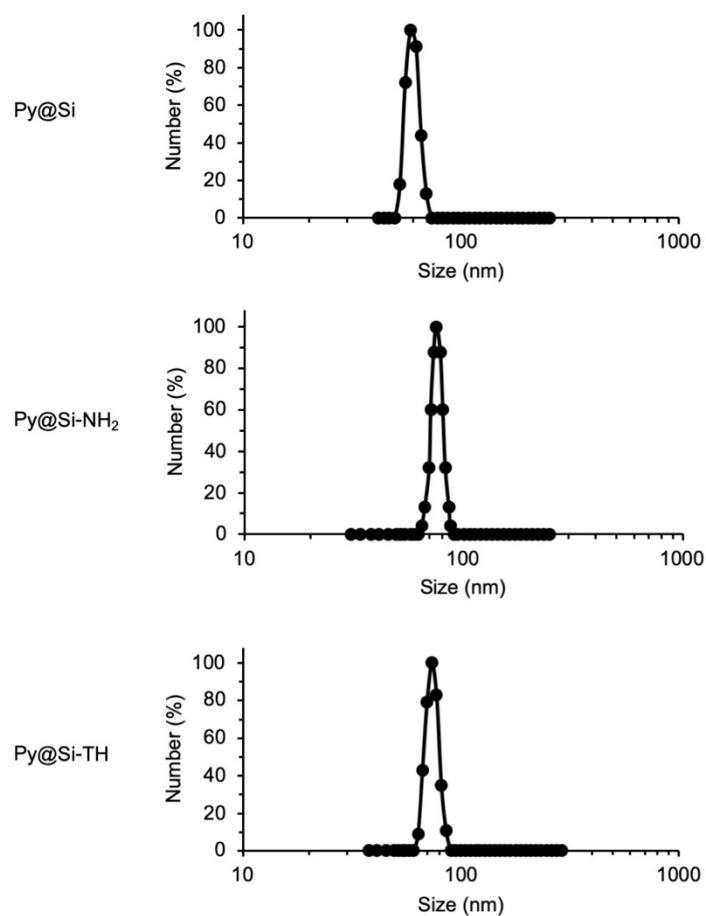

**Figure S1.** Size distribution of Py@Si-based nanoparticles with different surface modification in deionized water measured by dynamic light scattering (DLS). Py@Si nanoparticles:  $59.2 \pm 5.6$  nm; Py@Si-NH<sub>2</sub> nanoparticles:  $73.3 \pm 4.8$  nm; Py@Si-TH nanoparticles:  $77.8 \pm 7.6$  nm.

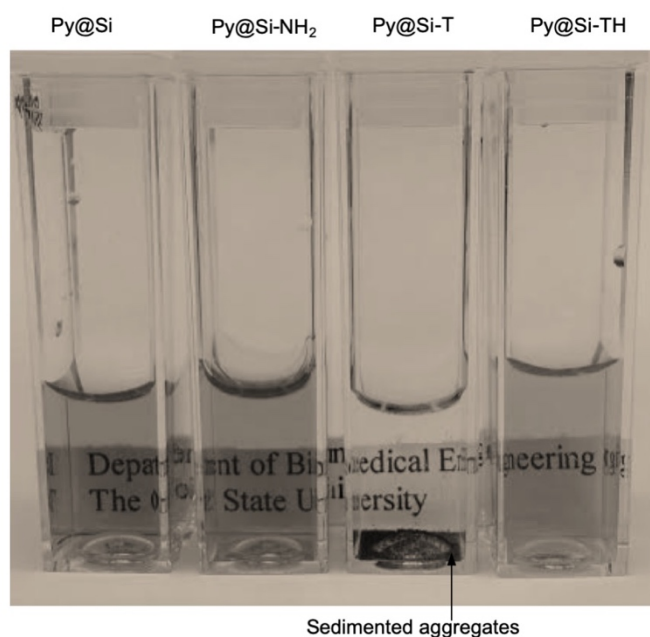

**Figure S2.** A typical picture of nanoparticles in deionized water after kept at room temperature for 6 days. Sedimented aggregates tend to form in the suspension of Py@Si-T nanoparticles. While the suspension of Py@Si-TH nanoparticles is clear and transparent, exhibiting good stability. The suspensions of Py@Si and Py@Si-NH<sub>2</sub> nanoparticles are also stable.

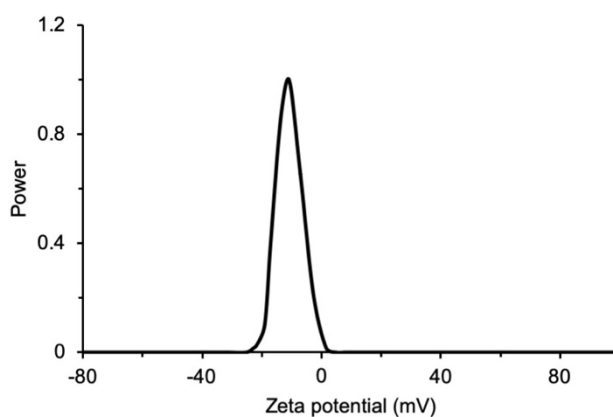

**Figure S3.** Surface zeta potential of Py@Si-TH at pH 6.0 ( $-10.9 \pm 4.3$  mV).

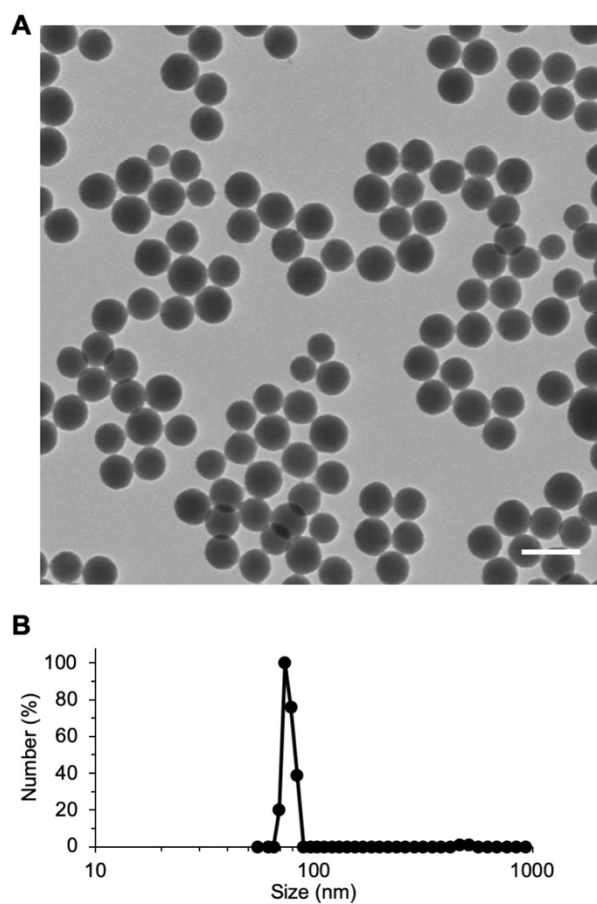

**Figure S4.** DOX encapsulation does not significantly affect the size and surface zeta potential of the Py@Si-TH nanoparticles. **A)** TEM image of Py@Si-TH-DOX nanoparticles. Scale bar: 100 nm. **B)** Size distribution ( $74.8 \pm 6.9$  nm) of Py@Si-TH-DOX nanoparticles incubated in cell culture medium at 37 °C for 12 h measured by dynamic light scattering (DLS).

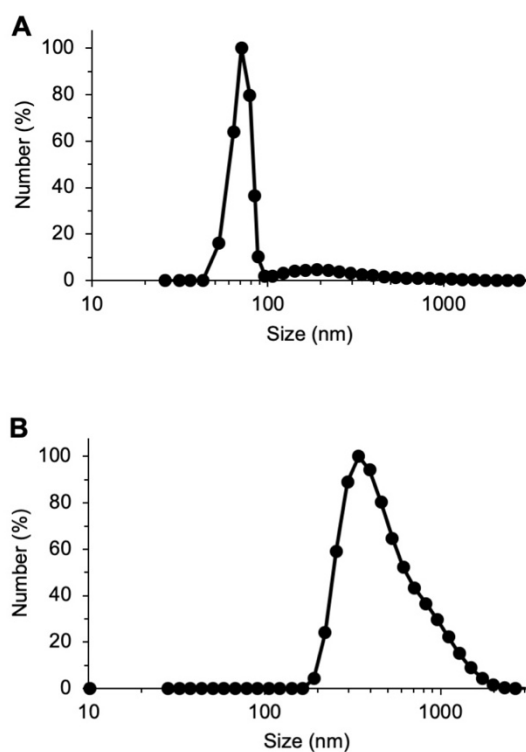

**Figure S5.** Size distribution of Py@Si-TH-DOX nanoparticles (with HA decorated on their surface, **A**) and Py@Si-T-DOX nanoparticles (with no HA on their surface, **B**) incubated in human blood serum at 37 °C for 12 h measured by dynamic light scattering (DLS). The Py@Si-TH-DOX and Py@Si-T-DOX nanoparticles are  $70.7 \pm 18.4$  nm and  $577.4 \pm 254.6$  nm, respectively.

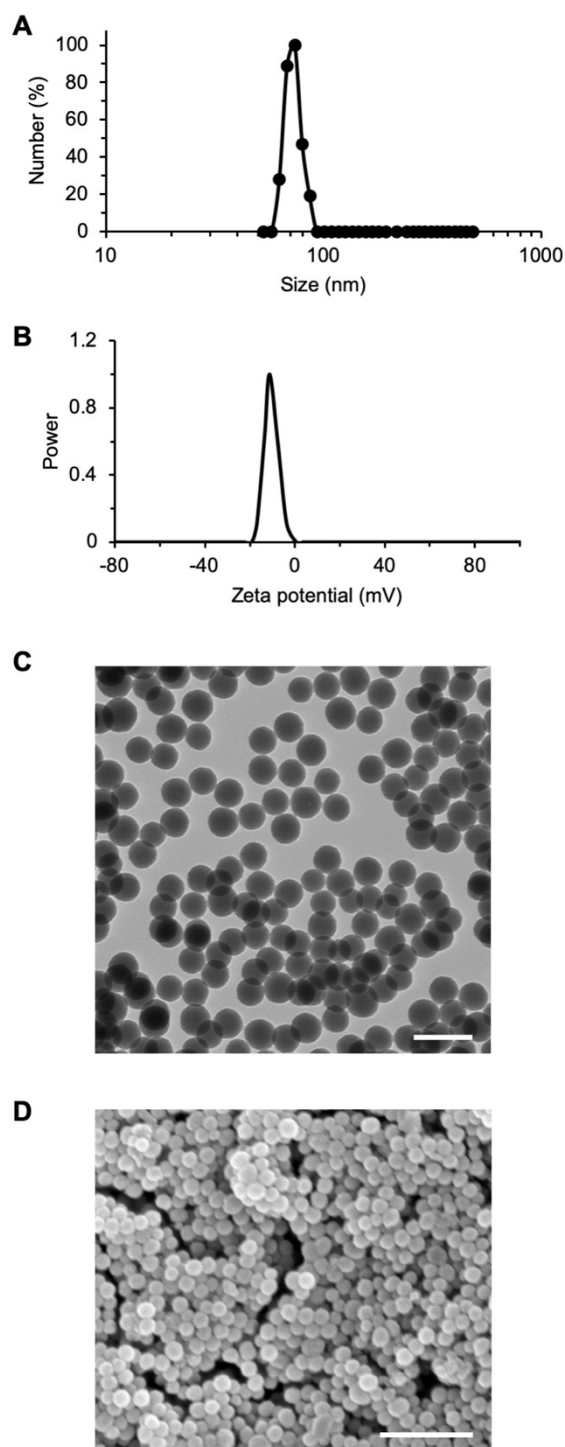

**Figure S6.** Characterization of Py@Si-H nanoparticles. **A)** Size distribution ( $73.3 \pm 7.8$  nm). **B)** Surface zeta potential ( $-11.3 \pm 3.6$  mV). **C)** TEM image. Scale bar: 100 nm. **D)** SEM image. Scale bar: 500 nm.

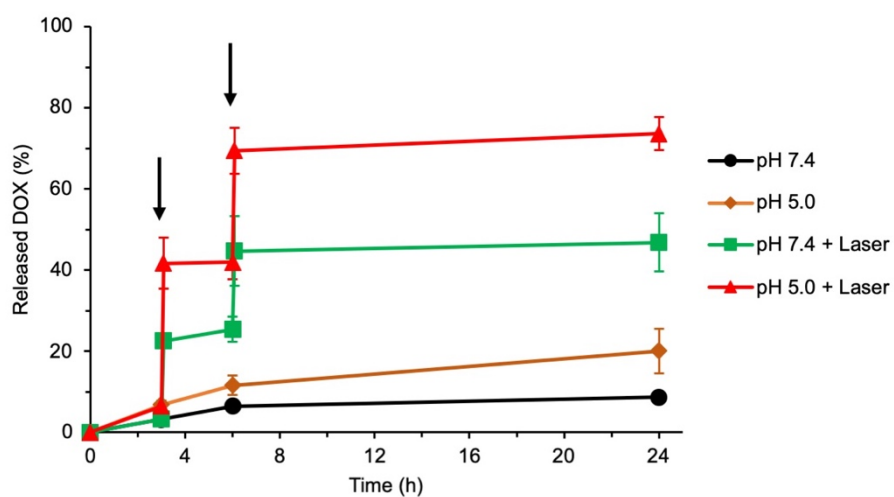

**Figure S7.** Release of DOX from the Py@Si-TH-DOX nanoparticles is slightly pH dependent and can be controlled by NIR laser irradiation. The NIR laser irradiation (indicated by arrows at two different times) was at  $1.0 \text{ W/cm}^2$  for 1 min.
